# Supplementary material for: Atomic Layer Deposition of Titanium Oxide-Based Films for Semiconductor Applications—Effects of Precursor and Operating Conditions
Source: MDPI journal article supplement (doi:10.3390/ma16165522), 2023-08-08
Supplement: s1 [file s1]

**Table S1.** Measured sheet resistances

| Precursor         | Thickness, nm | point1 | point2   | point3 | point4   | point5 | $\Omega/\text{sq}$ |
|-------------------|---------------|--------|----------|--------|----------|--------|--------------------|
| TDMA-Ti           | 3             | 222.7  | 242.5    | 220.2  | 204.1222 |        |                    |
| TDMA-Ti           | 3             | 207.8  | 185.9    | 171.8  |          |        |                    |
| TDMA-Ti           | 3             | 177.9  | 206.4    | 201.9  |          |        |                    |
| TDMA-Ti           | 6             | 171.5  | 281.5    | 238.6  | 230.5111 |        |                    |
| TDMA-Ti           | 6             | 271.3  | 236.1    | 169    |          |        |                    |
| TDMA-Ti           | 6             | 269    | 182.8    | 254.8  |          |        |                    |
| TDMA-Ti           | 9             | 291.4  | 404.1    | 288.4  | 257.8444 |        |                    |
| TDMA-Ti           | 9             | 300.8  | 193.4    | 275    |          |        |                    |
| TDMA-Ti           | 9             | 194.1  | 195.4    | 178    |          |        |                    |
| TDMA-Ti           | 12            | 174    | 176.2    | 173.7  | 174.9444 |        |                    |
| TDMA-Ti           | 12            | 173.6  | 173.3    | 173.3  |          |        |                    |
| TDMA-Ti           | 12            | 178.8  | 178.4    | 173.2  |          |        |                    |
| TDMA-Ti           | 15            | 175    | 180      | 175.6  | 179.1667 |        |                    |
| TDMA-Ti           | 15            | 179.6  | 178.2    | 181.2  |          |        |                    |
| TDMA-Ti           | 15            | 180    | 182      | 180.9  |          |        |                    |
| TDMA-Ti           | 20            | 171.4  | 181      | 174.5  | 201.3444 |        |                    |
| TDMA-Ti           | 20            | 242.6  | 272.3    | 236    |          |        |                    |
| TDMA-Ti           | 20            |        | 175.8    | 174.9  | 183.6    |        |                    |
|                   |               |        |          |        |          |        |                    |
| TiCl <sub>4</sub> | 3             | 569.5  | 555.5    | 535.4  | 546.7    |        |                    |
| TiCl <sub>4</sub> | 3             | 554    | 557.5    | 524.9  | 567.8    |        |                    |
| TiCl <sub>4</sub> | 6             | 375.5  | 6.557439 | 384    | 375      | 368    |                    |
| TiCl <sub>4</sub> | 6             | 390    | 18.28934 | 389    | 402      | 404    |                    |
| TiCl <sub>4</sub> | 6             | 378.5  | 30.68659 | 347    | 420      | 368    |                    |
| TiCl <sub>4</sub> | 9             | 345.6  | 349.3    | 285.1  | 455.2    |        |                    |
| TiCl <sub>4</sub> | 9             | 405.6  | 447.1    | 516    | 403.6    |        |                    |
| TiCl <sub>4</sub> | 9             | 661.8  | 1073     | 1032   | 1180     |        |                    |
| TiCl <sub>4</sub> | 12            | 976.45 | 151.7371 | 1019   | 967.8    | 1142   |                    |
| TiCl <sub>4</sub> | 12            | 519.75 | 143.9685 | 406    | 692      | 396    |                    |

|          |    |        |          |      |      |     |  |
|----------|----|--------|----------|------|------|-----|--|
| $TiCl_4$ | 12 | 1008.2 | 266.6725 | 736  | 1384 | 768 |  |
| $TiCl_4$ | 15 | 1818   | 1395     | 1116 | 1197 |     |  |
| $TiCl_4$ | 15 | 1252.8 | 106.1965 | 1415 | 1248 |     |  |
| $TiCl_4$ | 15 | 1220   | 1261     |      |      |     |  |
| $TiCl_4$ | 20 | 3201   | 1476     | 4896 | 1817 |     |  |
| $TiCl_4$ | 20 | 1393   | 1483     | 1053 | 1488 |     |  |

ce depending on the TiOx film thickness and used deposition precursor

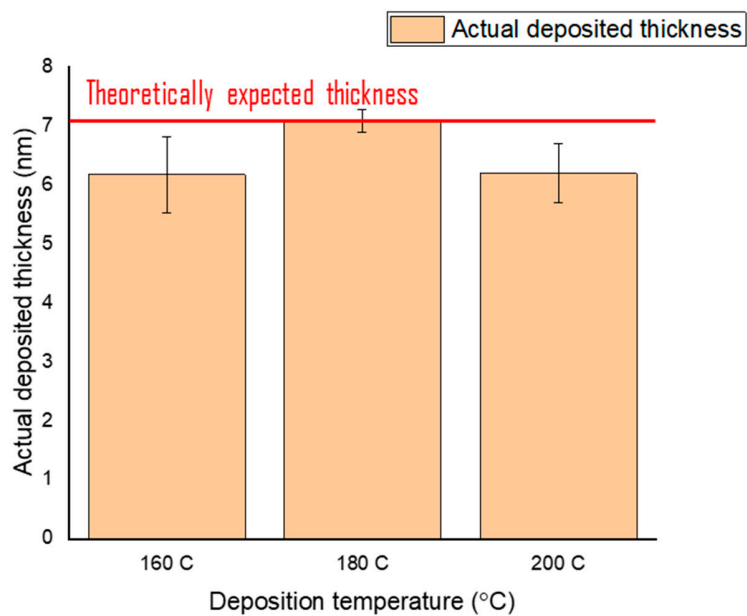

**Figure S1.** Ellipsometry measurements of the deposited TiOx film at different temperatures for TDMA-Ti precursor (140 deposition cycles)
